# Supplementary material for: A metal-enhanced fluorescence study of primary amines: determination of aminoglycosides with europium and gold nanoparticles
Source: Royal Society of Chemistry journal article supplement (doi:10.1039/c4ay02957g), 2014-12-19
Supplement: c4ay02957g1.pdf [file c4ay02957g1.pdf]

## Supplementary Information

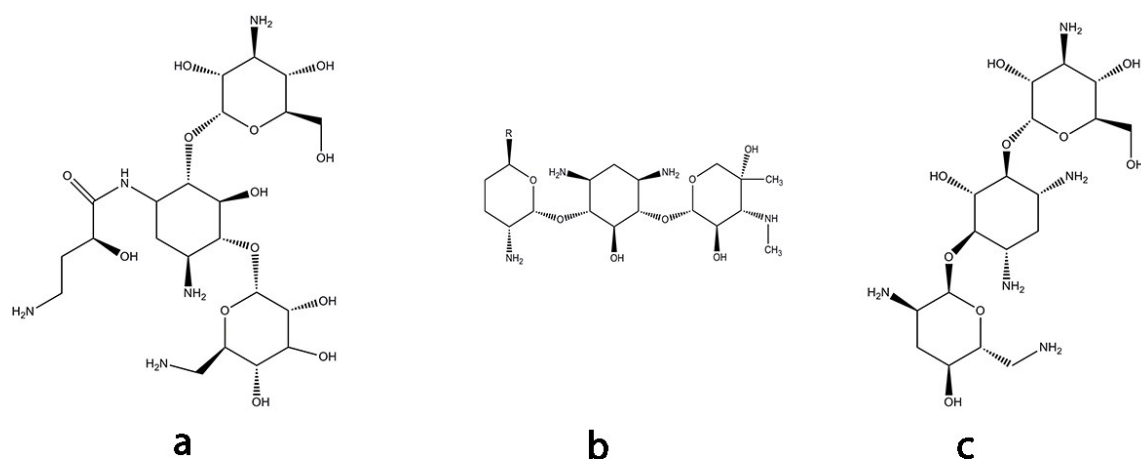

Figure S1. Molecular formula of a) amikacin b) gentamicin and c) tobramycin

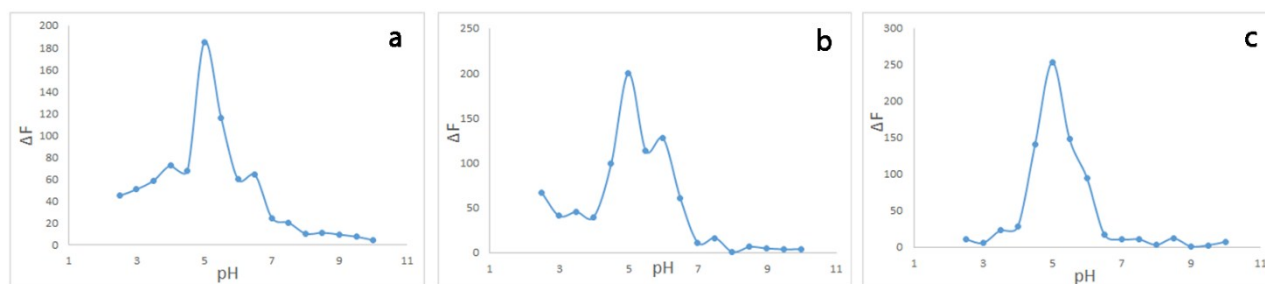

Figure S3. pH dependence of fluorescence quenching in aminoglycosides-AuNP reaction. a) amikacin b) gentamicin c) tobramycin

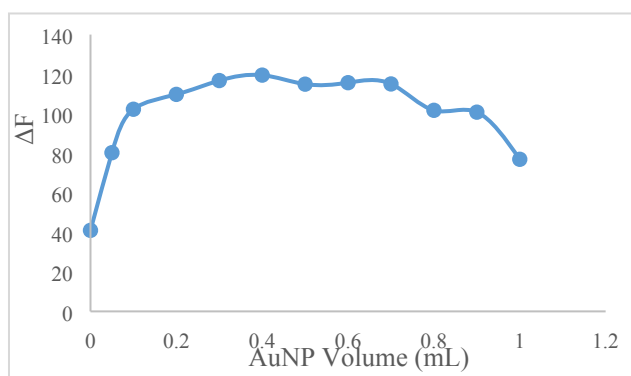

Figure S2. Optimization of AuNP concentration by fluorescence enhancement

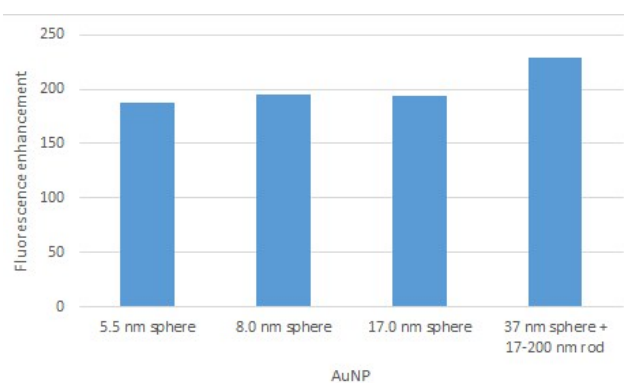

Figure S4. Comparison of different size and shape of AuNP by fluorescence enhancement.

Table S1. Standard addition results

| Amikacin                  |           |              | Gentamicin |              | Tobramycin |              |
|---------------------------|-----------|--------------|------------|--------------|------------|--------------|
| Added (%)                 | Found (%) | Recovery (%) | Found (%)  | Recovery (%) | Found (%)  | Recovery (%) |
| 50                        | 50.37     | 100.74       | 51.62      | 103.23       | 50.59      | 101.17       |
| 50                        | 50.58     | 101.16       | 51.09      | 102.18       | 50.23      | 100.47       |
| 50                        | 49.25     | 98.50        | 51.83      | 103.66       | 49.15      | 98.31        |
| 75                        | 74.90     | 99.87        | 73.77      | 98.37        | 75.68      | 100.90       |
| 75                        | 73.37     | 97.83        | 74.38      | 99.18        | 72.99      | 97.32        |
| 75                        | 73.07     | 97.42        | 74.30      | 99.06        | 73.02      | 97.36        |
| 100                       | 97.78     | 97.78        | 104.57     | 104.57       | 101.08     | 101.08       |
| 100                       | 97.92     | 97.92        | 102.49     | 102.49       | 102.05     | 102.05       |
| 100                       | 98.67     | 98.67        | 100.42     | 100.42       | 97.26      | 97.26        |
| Average                   |           | 98.88        |            |              | 101.46     | 99.55        |
| Standard Deviation        |           | 1.38         |            |              | 2.26       | 1.95         |
| Confidence Limit (p=0.05) |           | 0.85         |            |              | 1.40       | 1.21         |

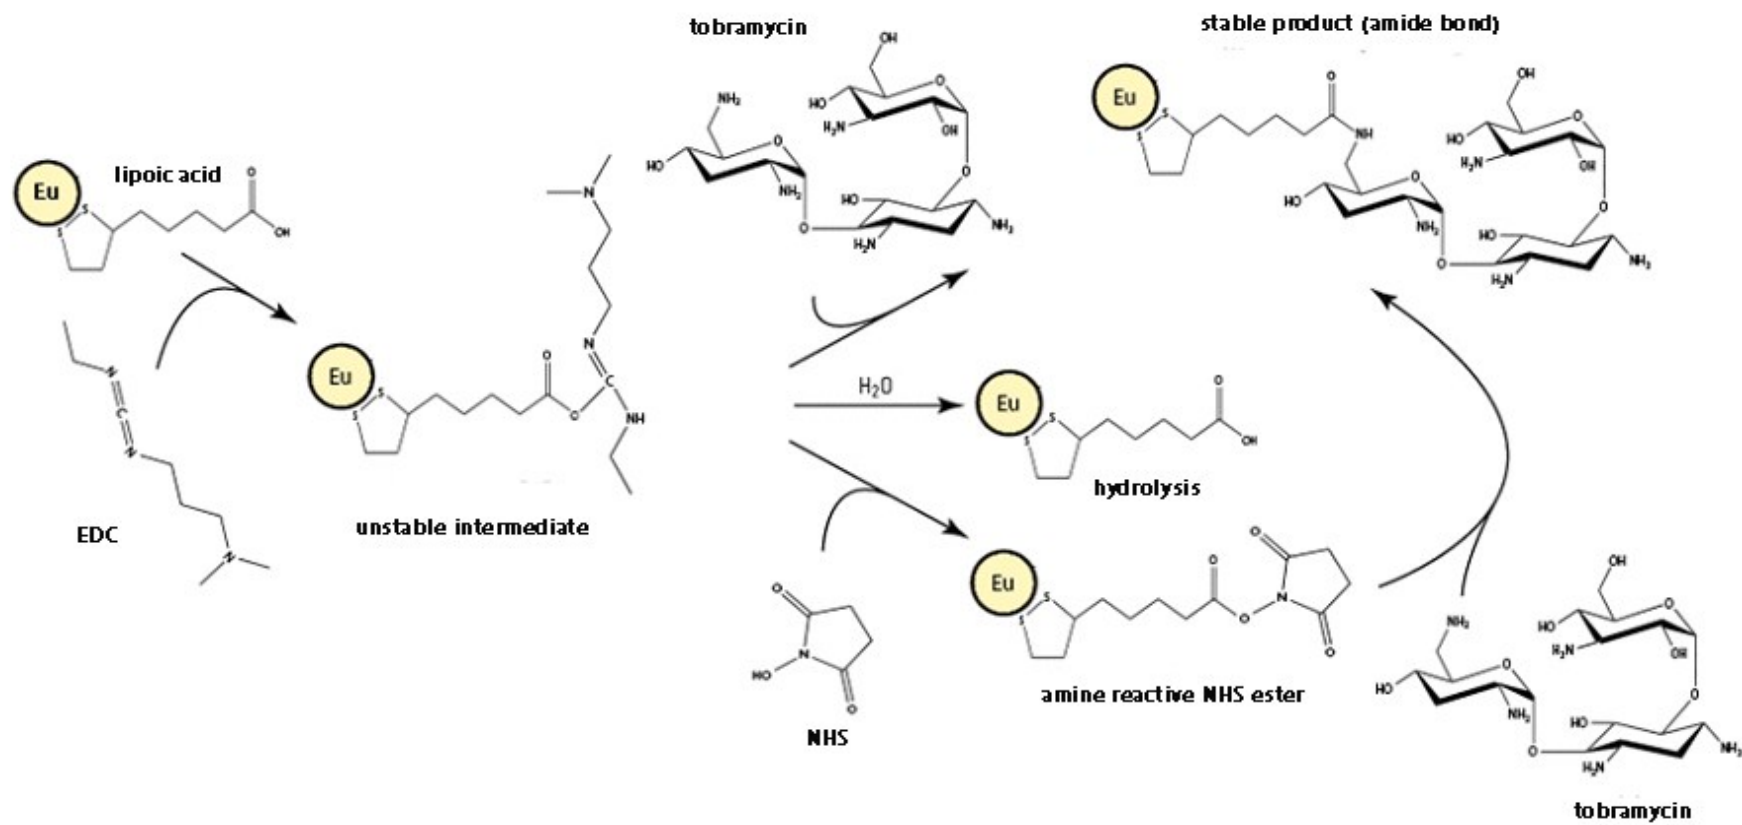

Figure S5. Schematic representation of the reaction between aminoglycosides and lipoic acid capped europium nanoparticles.
